# Supplementary material
Source: PubMed Central journal article supplement (PMC3226362)
Supplement: supp_111.185678_185678_suppl_figure_2.pdf [file supp_111.185678_185678_suppl_figure_2.pdf]

# Impact of pyrrolidine dithiocarbamate and interleukin-6 on mTOR complex 1 regulation and global protein translation

Song S, Abdelmohsen K, Zhang Y, Becker KG, Gorospe M, and Bernier M  
J Pharmacol Exp Ther

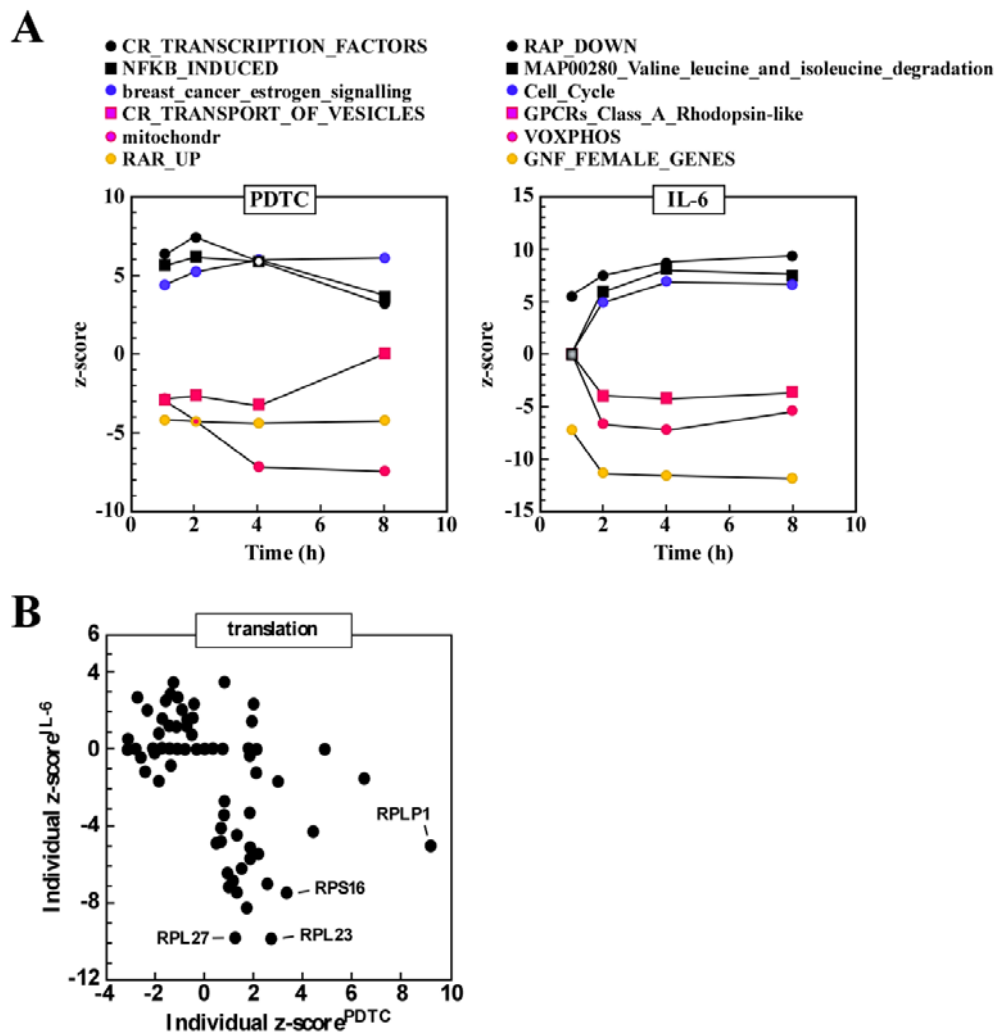

**Supplemental FIG. 2. Reciprocal regulation of gene expression by PDTC and IL-6 in HepG2 cells.** A, Profiles of various gene sets over time in response to 50  $\mu$ M PDTC and 20 ng/ml IL-6. All gene sets were significant at  $P < 0.05$ . B, Scatter plot analysis of the genes indexed in 'translation' (GO:0006412) that were responsive to PDTC and IL-6.
